1        **D614G mutation of SARS-CoV-2 spike protein enhances viral infectivity**

2        ***Running Title*** : D614G mutant spike increases SARS-CoV-2 infectivity

3        Jie Hu<sup>1, #</sup>, Chang-Long He<sup>1, #</sup>, Qing-Zhu Gao<sup>1, #</sup>, Gui-Ji Zhang<sup>1 #</sup>, Xiao-Xia Cao<sup>1</sup>,  
4        Quan-Xin Long<sup>1</sup>, Hai-Jun Deng<sup>1</sup>, Lu-Yi Huang<sup>1</sup>, Juan Chen<sup>1</sup>, Kai Wang<sup>1,\*</sup>, Ni  
5        Tang<sup>1,\*</sup>, Ai-Long Huang<sup>1,\*</sup>

6

7        <sup>1</sup>Key Laboratory of Molecular Biology for Infectious Diseases (Ministry of  
8        Education), Institute for Viral Hepatitis, Department of Infectious Diseases, The  
9        Second Affiliated Hospital, Chongqing Medical University, Chongqing, 400010,  
10        China

11        #These authors contributed equally to this work.

12

13        **\*Corresponding authors:**

14        Ai-Long Huang, Ni Tang, Kai Wang, Key Laboratory of Molecular Biology for  
15        Infectious Diseases (Ministry of Education), Institute for Viral Hepatitis, Department  
16        of Infectious Diseases, The Second Affiliated Hospital, Chongqing Medical  
17        University, Chongqing, China. Phone: 86-23-68486780, Fax: 86-23-68486780, E-  
18        mail: ahuang@cqmu.edu.cn (A.L.H.), nitang@cqmu.edu.cn (N.T.),  
19        wangkai@cqmu.edu.cn (K.W.)

20

## 21 **Abstract**

22 Coronavirus disease 2019 (COVID-19) is caused by severe acute respiratory  
23 syndrome coronavirus 2 (SARS-CoV-2). The spike (S) protein that mediates  
24 SARS-CoV-2 entry into host cells is a major target for vaccines and therapeutics.  
25 Thus, insights into its sequence variations are key to understanding the infection  
26 and antigenicity of SARS-CoV-2. A dominant mutational variant at position 614 of  
27 the S protein (aspartate to glycine, D614G mutation) was observed in the SARS-  
28 CoV-2 genome sequence obtained from the Nextstrain database. Using a  
29 pseudovirus-based assay, we identified that S-D614 and S-G614 protein  
30 pseudotyped viruses share a common receptor, human angiotensin-converting  
31 enzyme 2 (ACE2), which could be blocked by recombinant ACE2 with the fused Fc  
32 region of human IgG1. However, S-D614 and S-G614 protein demonstrated  
33 functional differences. First, S-G614 protein could be cleaved by serine protease  
34 elastase-2 more efficiently. Second, S-G614 pseudovirus infected 293T-ACE2  
35 cells significantly more efficiently than did the S-D614 pseudovirus, especially in  
36 the presence of elastase-2. Third, an elastase inhibitor approved for clinical use  
37 blocked elastase-enhanced S-G614 pseudovirus infection. Moreover, 93% (65/70)  
38 convalescent sera from patients with COVID-19 could neutralize both S-D614 and  
39 S-G614 pseudoviruses with comparable efficiencies, but about 7% (5/70)  
40 convalescent sera showed reduced neutralizing activity against the S-G614  
41 pseudovirus. These findings have important implications for SARS-CoV-2  
42 transmission and immune interventions.

43 **Keywords:** antiviral therapeutics, coronavirus, COVID-19, D614G mutation,  
44 infectivity, neutralizing antibodies, pseudovirus, SARS-CoV-2, spike protein

45

## 46 **Introduction**

47 Severe acute respiratory syndrome coronavirus 2 (SARS-CoV-2) is a novel  
48 coronavirus reported in 2019 that caused the recent outbreak of coronavirus  
49 disease 2019 (COVID-19)<sup>1</sup>. By July 4, 2020, the World Health Organization (WHO)  
50 reported that 10.92 million people worldwide had been infected with SARS-CoV-2,  
51 and that 523 000 individuals had died of COVID-19. This pandemic has had a  
52 significant adverse impact on international, social, and economic activities.

53 Coronaviruses are enveloped, positive-stranded RNA viruses that contain the  
54 largest known RNA genomes to date. The RNA genome of SARS-CoV-2 has been  
55 rapidly sequenced to facilitate diagnostic testing, molecular epidemiologic source  
56 tracking, and development of vaccines and therapeutic strategies<sup>2</sup>. The mutation  
57 rate for RNA viruses is extremely high, which may contribute to their transmission  
58 and virulence. The only significant variation in the SARS-CoV-2 spike (S) protein is  
59 a non-synonymous D614G (aspartate (D) to glycine (G)) mutation<sup>3</sup>. Primary data  
60 showed that S-G614 is a more pathogenic strain of SARS-CoV-2 with high  
61 transmission efficiency<sup>3</sup>. However, whether the D614G mutation in the S protein  
62 affects viral entry and infectivity in a cellular model is still unclear.

63

64 The S protein of coronavirus, the major determinant of host and tissue tropism, is a

65 major target for vaccines, neutralizing antibodies, and viral entry inhibitors<sup>4,5</sup>.

66 Similar to SARS-CoV, the cellular receptor of SARS-CoV-2 is angiotensin-

67 converting enzyme 2 (ACE2); however, the SARS-CoV-2 S protein has a 10- to

68 20-fold higher affinity for ACE2 than the corresponding S protein of SARS-CoV<sup>6,7</sup>.

69 Coronaviruses use two distinct pathways for cell entry: protease-mediated cell-

70 surface and endosomal pathways<sup>8</sup>. The S proteins of several coronaviruses are

71 cleaved by host proteases into S1 subunit for receptor binding and S2 subunit for

72 membrane fusion at the entry step of infection. Several cellular proteases including

73 furin, transmembrane protease serine 2 (TMPRSS2), and cathepsin (Cat) B/L are

74 critical for priming the SARS-CoV-2 S protein to enhance ACE2-mediated viral

75 entry<sup>4</sup>. Recently, Bhattacharyya et al. (2020) reported that a novel serine protease

76 (elastase-2) cleavage site was introduced into the S-G614 protein of SARS-CoV-

77 2<sup>9</sup>. However, it is unknown whether the S-G614 protein can be processed and

78 activated by elastase-2 in a cellular model. The S protein plays a key role in the

79 evolution of coronaviruses to evade the host immune system. It is still uncertain

80 whether the D614G mutation affects the antigenic properties of the S protein.

81 Meanwhile, whether elastase-2 inhibitors and convalescent serum samples of

82 COVID-19 can block the infection of the D614G variant of SARS-CoV-2 remains

83 unknown.

84

85 In this study, we analyzed the S gene sequences of SARS-CoV-2 submitted to the

86 Global Initiative on Sharing All Influenza Data (GISAID) database. We examined

87 the expression and cleavage of S-D614 and S-G614 protein in cell lines. Using a  
88 luciferase (Luc)-expressing lentiviral pseudotype system, we established a  
89 quantitative pseudovirus-based assay for the evaluation of SARS-CoV-2 cell entry  
90 mediated by the viral S protein variants. We also compared the neutralizing  
91 sensitivity of the S-D614 and S-G614 protein pseudoviruses to convalescent sera  
92 from patients with COVID-19. Our study provides further insights into the  
93 transmission and immune interventions of this newly emerged virus.

94

## 95 **Results**

### 96 **D614G mutation of SARS-CoV-2 S protein was globally distributed**

97 The S protein of SARS-CoV-2, which contains 1,273 amino acids, forms a trimeric  
98 spike on the virion surface and plays an essential role in viral entry. We analyzed  
99 the SARS-CoV-2 S protein amino acid sequence from viral genomic sequences in  
100 the GISAID database. In line with prior reports, we found a globally distributed S  
101 protein mutation, D614 to G614, which represented 64.6% of all the analyzed  
102 sequences (Fig. 1 and Table 1). Among the top 10 most abundant non-  
103 synonymous mutations observed in the S protein, the relative abundance of the  
104 D614G mutant (the clade G) was the highest around the world, indicating that  
105 G614 strain may be selectively advantageous. Since the S protein is critical to  
106 coronavirus infection, we sought to explore the potential impact of the most  
107 prevalent D614G mutation on the S protein structure, expression, and function.  
108 Using the cryo-electron microscopy structure of S protein (PDB ID: 6ZGE)

109 determined by Wrobel et al.<sup>10</sup>, we analyzed the potential effects of the D614G  
110 mutation. As shown in Fig. 1b, residue D614 is located at the C-terminal region of  
111 the S1 domain, which directly associates with S2. On the one hand, residue D614  
112 forms a hydrogen bond with backbone of G593 and a salt bridge with K854, and  
113 then is capped by the folded 833-855 motif of chain B (Fig. 1c). D614G mutation  
114 would abolish these interactions. This change may destabilize the locked  
115 conformation to promote receptor binding domain (RBD) opening and potentially  
116 increase virus-receptor binding and membrane fusion activities. On the other hand,  
117 we observed that D614 is remarkably close to the N-linked glycosylation site N616  
118 (Fig 1c). Thus, the D614G mutation may enhance the fitness of SARS-CoV-2 by  
119 increasing S protein stability and participating in glycosylation. Further studies are  
120 required to determine the structure of S-G614 protein.

121

### 122 **D614G mutation enhanced the cleavage of S protein variant by proteases**

123 As the D614G mutation is proximal to the S1 cleavage domain, we predicted  
124 potential cleavage sites of proteases in S protein variants using PROSPER<sup>11</sup>, and  
125 identified a novel serine protease (elastase-2) cleavage site at residues 615-616  
126 on the S1-S2 junction of the S-G614 protein (Fig. 2a, Supplementary information,  
127 Table S2). To evaluate the expression and cleavage of SARS-CoV-2 S protein in a  
128 human cell line, the codon-optimized S protein-expressing plasmids (pS-D614 and  
129 pS-G614) were transfected into HEK 293T cells. The immunoblot analysis of  
130 whole cell lysates revealed that both S-D614 and S-G614 proteins showed two

131 major protein bands (unprocessed S and cleaved S1 subunit), when allowed to  
132 react with the monoclonal antibody targeting the RBD on the SARS-CoV-2 S  
133 protein (Fig. 2b). However, the pS-G614-transfected cells showed a stronger S1  
134 signal than pS-D614-transfected cells, indicating that the D614G mutation altered  
135 the cleavability of the S protein by cellular proteases. Moreover, the elastase  
136 inhibitor sivelestat sodium significantly decreased the S1 signal of S-D614 protein  
137 (Fig. 2b). These data indicate that the D614G mutation of SARS-CoV-2 S  
138 facilitates its cleavage by host serine protease elastase-2. The coronavirus S  
139 protein must be cleaved by host proteases to enable membrane fusion, which is  
140 critical for viral entry. Next, we sought to explore the impact of D614G mutation on  
141 viral entry.

142

### 143 **Evaluating viral entry efficacies between S-D614 and S-G614 pseudotyped** 144 **lentiviral particles**

145 Lentiviral vectors can be pseudotyped with various heterologous viral  
146 glycoproteins that modulate cellular tropism and entry properties<sup>12</sup>. Due to the  
147 highly pathogenic nature of SARS-CoV-2, infectious SARS-CoV-2 must be  
148 handled in a biosafety level 3 (BSL-3) facility. We generated pseudotyped SARS-  
149 CoV-2 based on the viral S protein using a lentiviral system, which introduced a  
150 Luc (luciferase) reporter gene for quantification of SARS-CoV-2 S-mediated entry.  
151 Thereafter, pNL4-3.Luc.R-E- was co-transfected with pS-D614 and pS-G614 to  
152 package the SARS-CoV-2 S pseudotyped single-round Luc virus in HEK 293T

153 cells.

154 The titers of S-D614 and S-G614 protein pseudotyped viruses were determined by  
155 reverse transcriptase quantitative polymerase chain reaction (RT-qPCR)  
156 expressed as the number of viral RNA genomes per mL, and then adjusted to the  
157 same concentration ( $3.8 \times 10^4$  copies in 50  $\mu$ L) for the following experiments. The  
158 virus infectivity was determined by a Luc assay expressed as relative  
159 luminescence units (RLU). HEK 293T cells expressing human ACE2 (293T-ACE2)  
160 were used to test the correlation between ACE2 expression and pseudoviral  
161 susceptibility. The vesicular stomatitis virus G (VSV-G) pseudovirus was used as  
162 control. As shown in Fig. 3a, both HEK 293T and 293T-ACE2 cells could be  
163 effectively transduced by VSV-G pseudovirus. However, the entry of S-D614 and  
164 S-G614 pseudoviruses is highly dependent on its cellular receptor ACE2  
165 expression. The 293T-ACE2 cells showed an approximately 250-fold and 530-fold  
166 increase in Luc activity when transduced by S-D614 and S-G614 pseudoviruses  
167 compared to HEK 293T cells, respectively (Fig. 3a). We then detected the  
168 inhibitory ability of ACE2-Ig, a fusion protein consisting of the extracellular domain  
169 (Met 1-Ser 740) of human ACE2 linked to the Fc region of human IgG1 at the C-  
170 terminus<sup>13</sup>. Both S-D614 and S-G614 pseudoviruses were potently inhibited by  
171 ACE2-Ig, and the IC<sub>50</sub> (the concentration causing 50% inhibition of pseudoviral  
172 infection) values were 0.13 and 0.15  $\mu$ g/mL, respectively (Fig. 3b). To further  
173 compare the viral entry efficiency mediated by S variants, we detected the Luc  
174 activity at different time points post-infection. With the G614 S variant, the increase



175 in viral transduction over the D614 variant was 2.2-fold at 48 h post-infection. The  
176 highest transduction efficiency (approximately  $2.5 \times 10^4$  RLU) was observed 72 h  
177 post-infection with the S-G614 pseudovirus, which was approximately 2.4-fold  
178 higher than that of the S-D614 pseudovirus (Fig. 3c). These data suggest that the  
179 D614G mutation in S protein significantly promotes viral entry into ACE2-  
180 expressing cells, and ACE2-Ig efficiently blocks both wild-type and mutant S  
181 pseudotype virus infection.

182 We next explored the mechanism by which S-G614 increased pseudoviral  
183 infectivity. The proteolytic activation of S protein is required for coronavirus  
184 infectivity, and the protease-mediated cell-surface pathway is critical for SARS-  
185 CoV-2 entry<sup>4</sup>. Since we observed S-G614 could be more efficiently cleaved by the  
186 host protease when exogenously expressed in 293T cells, we assumed that host  
187 proteases may be involved in the enhancement of S-G614 viral entry. As shown in  
188 Fig. 3d, when 293T-ACE2 cells were treated with 100  $\mu\text{g}/\text{mL}$  elastase before virus  
189 infection, the RLU value in S-G614 pseudovirus-infected cells ( $6.9 \times 10^4$ ) was  
190 about 3.1 fold higher than that of the S-D614 ( $2.2 \times 10^4$ ), indicating that residue  
191 G614 facilitates elastase-induced viral entry. In addition, the clinically proven  
192 serine protease inhibitor sivelestat sodium, which is active against elastase, dose-  
193 dependently blocked S-G614-driven entry into 293T-ACE2 in the presence of 100  
194  $\mu\text{g}/\text{mL}$  elastase (Fig. 3e). These data indicated that the infectivity of S-G614  
195 pseudovirus containing an additional elastase-2 cleavage site is enhanced by  
196 exogenous elastase; therefore, S-G614 pseudovirus is more sensitive to sivelestat

197 sodium than the S-D614 pseudovirus.

198 We also tested two other protease inhibitors, camostat mesylate and E-64d, which  
199 block host TMPRSS2 and CatB/L, respectively. In 293T-ACE2 cells lacking  
200 TMPRSS2, the serine protease inhibitor camostat mesylate did not inhibit S-D614  
201 or S-G614 pseudoviral infection (Fig. S1a), while the cysteine protease inhibitor E-  
202 64d significantly blocked the entry of these two pseudoviruses, with IC<sub>50</sub> values of  
203 0.37 μM and 0.24 μM for S-D614 and S-G614 pseudoviruses, respectively (Fig.  
204 S1b). As expected, these protease inhibitors had no impact on VSV-G pseudovirus  
205 infection. Together, these results suggest that S-mediated viral entry into 293T-  
206 ACE2 cells deficient in TMPRSS2 is endosomal cysteine protease CatB/L-  
207 dependent; therefore, S-D614 and S-G614 pseudoviruses showed similar  
208 sensitivity to the CatB/L inhibitor E-64d in 293T-ACE2 cells.

209

## 210 **Neutralization effect of convalescent sera from patients with COVID-19** 211 **against S-D614 and S-G614 pseudoviruses**

212 Neutralizing antibodies are important for prevention of and possible recovery from  
213 viral infections. However, as viruses mutate during replication and spread, host  
214 neutralizing antibodies generated in the earlier phase of the infection may not be  
215 as effective later on<sup>14,15</sup>. To test whether D614G mutations could affect the  
216 neutralization sensitivity of the virus, the neutralization activity of serum samples  
217 from convalescent patients with COVID-19 against SARS-CoV-2 S-D614 and S-  
218 G614 pseudoviruses were evaluated. To perform the neutralization assay, 50 μL

219 pseudovirus ( $3.8 \times 10^4$  copies) was incubated with serially diluted sera. As shown  
220 in Fig. 4a, the inhibition rate of sera from convalescent COVID-19 patients was  
221 analyzed at a single dilution of 1:1000, among the 70 tested sera, 65 of them  
222 showed neutralizing activities against both S-D614 and S-G614 pseudoviruses  
223 with comparable efficiencies. However, five sera samples (patients 1#, 7#, 40#,  
224 42# and 52#) showed decreased inhibition rate against the S-G614 pseudovirus.  
225 The serum from patient 1# failed to neutralize the S-G614 pseudovirus, even  
226 though it neutralized about 30% of the S-D614 pseudovirus at a 1:1000 dilution.  
227 Then, the inhibition curves and half-maximal inhibitory dose ( $ID_{50}$ ) of sera samples  
228 from five convalescent patients and one healthy donor were analyzed. Sera from  
229 patients 17# and 39#, which were able to neutralize both pseudoviruses to similar  
230 degrees, showed similar  $ID_{50}$  values (Fig. 4b). However, sera from patients 1#, 7#,  
231 40#, 42# and 52# showed relative high neutralizing activity against the S-D614  
232 pseudovirus with an  $ID_{50}$  ranging from 729 to 1524, but showed decreased  
233 neutralizing activity against the S-G614 pseudovirus with an  $ID_{50}$  ranging from 216  
234 to 367, indicating a 2.5- to 5.9-fold reduction in neutralizing titers (Fig. 4b). These  
235 data indicate that most antisera (93%) from patients, likely infected with earlier  
236 SARS-CoV-2 variant, can cross neutralize S-G614 variant, although D614G  
237 mutation decreases the neutralization sensitivity to 7% convalescent sera.

238

## 239 **Discussion**

240 Pseudovirus-based assays have been widely used for the study of cellular tropism,

241 receptor recognition, viral inhibitors, and evaluation of neutralizing antibodies  
242 without the requirement of BSL-3 laboratories. We constructed pseudotyped  
243 SARS-CoV-2 based on the viral S protein using a lentiviral system, which  
244 incorporated a Luc reporter gene for easy quantification of coronavirus S protein-  
245 mediated entry. We investigated the major mutation in the S protein at position 614  
246 and found that serine protease elastase-2 participates in the proteolytic activation  
247 of the S-G614 protein, thereby enhancing viral entry into 293T-ACE2 cells (Fig. 5).  
248 We demonstrated the potential role of the elastase-2 inhibitor sivelestat in blocking  
249 S-G614 pseudovirus infection in the presence of elastase. Although S-D614 and  
250 S-G614 variants could be similarly neutralized by most antisera, we found that the  
251 S-G614 pseudovirus was more resistant to some neutralizing antisera than S-  
252 D614 pseudovirus.

253

254 Several findings stand out in our study: First, we found that the entry efficiency of  
255 S-G614 pseudotyped virus was about 2.4 times higher than that of the S-D614  
256 pseudovirus when viral input doses were normalized, suggesting that D614G  
257 mutation promotes the infectivity of SARS-CoV-2 and enhances viral  
258 transmissibility. Since the pseudoviruses were employed in a single round of  
259 infection assay, this seemingly small increase in entry activity could cause a large  
260 difference in viral infectivity *in vivo*. Yao et al. (2020) reported that a patient-  
261 derived viral isolate ZJU-1, which harbors the D614G mutation, has a viral load 19  
262 times higher than isolate ZJU-8 (harboring the S-D614) when Vero-E6 cells were

263 infected<sup>16</sup>. However, the ZJU-1 isolate contained two other non-synonymous  
264 mutations in open reading frame 1a (ORF1a) and envelope (E) gene. Our results  
265 also elucidated the cause of increased entry efficiency due to the D614G mutation  
266 in the S protein of SARS-CoV-2. The S-G614 protein contains a novel serine  
267 protease cleavage site, so it could be cleaved by host elastase-2 more efficiently.  
268 Previously studies on SARS-CoV demonstrated that the protease-mediated cell  
269 surface entry facilitated a 100- to 1,000-fold increase in efficient infection  
270 compared to the endosomal pathway in the absence of proteases<sup>17</sup>.

271

272 Second, we found that elastase-enhanced S-G614 pseudoviral infection could be  
273 partially blocked by sivelestat sodium. Elastase-2, also known as neutrophil  
274 elastase, plays an important role in degenerative and inflammatory diseases.  
275 Sivelestat, a drug approved to treat acute respiratory distress syndrome (ARDS) in  
276 Japan and South Korea, has a beneficial effect on the pulmonary function of  
277 patients with ARDS and systemic inflammatory response syndrome<sup>18</sup>. About 10–  
278 15% of patients with COVID-19 progress to ARDS<sup>19</sup>. Since sivelestat may not only  
279 mitigate the damage of neutrophil elastase on lung connective tissue, but also limit  
280 virus spread by inhibiting S protein processing, Mohamed et al. (2020) advocated  
281 the use of sivelestat to alleviate neutrophil-induced damage in critically ill patients  
282 with COVID-19<sup>20</sup>. Our *in vitro* results also indicate that sivelestat sodium or similar  
283 neutrophil elastase inhibitors might be an effective option for treatment of COVID-  
284 19 caused by SARS-CoV-2 harboring the D614G mutation.

285

286 Third, we observed that the S-G614 pseudovirus was more resistant to  
287 neutralization by convalescent sera from patients, likely infected in mid- to late-  
288 January when wild-type (D614) virus was mainly circulating in China. Koyama et  
289 al. (2020) reported that D614G is located in one of the predicted B-cell epitopes of  
290 SARS-CoV-2 S protein, and this is a highly immunodominant region and may  
291 affect the effectiveness of vaccine with wild-type S protein<sup>14</sup>. D614 is conserved in  
292 the S protein of SARS-CoV in 2003. Previous studies of SARS-CoV suggested  
293 that the peptide S<sub>597-625</sub> is a major immunodominant peptide in humans and elicits  
294 a long-term B-cell memory response after natural infection with SARS-CoV<sup>21</sup>.  
295 Regions between amino acids 614 and 621 of SARS-CoV-2 S protein were also  
296 identified as a B-cell epitope by different methods, and the change in D614G may  
297 affect the antigenicity of this region<sup>22</sup>. In our study, we observed that 7% (5/70)  
298 convalescent sera showed markedly different neutralization activities between S-  
299 G614 and S-G61 protein pseudotyped viruses, indicating that the D614G mutation  
300 reduces the sensitivity to neutralizing antibodies from some patients infected with  
301 earlier SARS-CoV-2 variant. Whether these patients were at high risk of reinfection  
302 with the S-G614 variant should be explored in further studies. It will also be  
303 important to determine the breadth of the neutralizing capacity of vaccine-induced  
304 neutralizing antibodies.

305

306 Recently, several groups also reported that S-G614 enhances viral infectivity

307 based on pseudovirus assays<sup>23-26</sup>, but due to the small sample size, they found no  
308 effect on the neutralization sensitivity of the virus<sup>23,24,26</sup>. Given the evolving nature  
309 of the SARS-CoV-2 RNA genome, antibody treatment and vaccine design require  
310 further considerations to accommodate D614G and other mutations that may  
311 affect the immunogenicity of the virus.

312

313 Our study had some limitations. First, 19 amino acids of S protein on the C-  
314 terminal were not included in order to improve the packaging efficiency of the  
315 SARS-CoV-2 S protein pseudotyped virus, and this pseudovirus only recapitulates  
316 viral entry events. Therefore, additional assays with authentic SARS-CoV-2  
317 viruses are required. Second, we only tested neutralizing antibodies against the S  
318 protein. Previous studies on SARS-CoV indicated that only a small fraction of  
319 memory B cells specific for SARS-CoV antigens are directed against neutralizing  
320 epitopes present on the S protein<sup>27</sup>. Third, in addition to D614G, further studies on  
321 other mutations in the S protein are needed to evaluate their impact on SARS-  
322 CoV-2 infectivity, pathogenicity, and immunogenicity. Further studies are needed  
323 to determine the impact of these mutations on the severity of COVID-19.

324

325 In summary, we established a SARS-CoV-2 S protein-mediated pseudoviral entry  
326 assay and explored the cellular entry of S-D614 and S-G614 pseudotyped viruses.  
327 Our study provided evidence that the D614G mutation introduces an additional  
328 elastase-2 cut site in the S protein, thereby promoting its cleavage and viral cell

329 entry, resulting in SARS-CoV-2 becoming more infectious. Importantly, the D614G  
330 mutation reduced the sensitivity of the virus to serum neutralizing antibodies in 7%  
331 convalescent patients with COVID-19. Our study will be helpful for understanding  
332 SARS-CoV-2 transmission and for the design of vaccines and therapeutic  
333 interventions against COVID-19.

334

### 335 **Materials and Methods**

336 **Plasmids.** The codon-optimized gene encoding SARS-CoV-2 S protein (GenBank:  
337 QHD43416) with C-terminal 19-amino acid deletion was synthesized by Sino  
338 Biological Inc (Beijing, China), and cloned into the *KpnI* and *XbaI* restriction sites  
339 of pCMV3 vector (pCMV3-SARS-CoV-2-S-C19del, denoted as pS-D614). The  
340 D614G mutant S-expressing plasmid (denoted as pS-G614) was constructed by  
341 site-directed mutagenesis, with pS-D614 plasmid as a template. The HIV-1 NL4-3  
342  $\Delta$ Env Vpr luciferase reporter vector (pNL4-3.Luc.R-E-) constructed by N. Landau<sup>28</sup>  
343 was provided by Prof. Cheguo Cai from Wuhan University (Wuhan, China). The  
344 VSV-G-expressing plasmid pMD2.G was provided by Prof. Ding Xue from  
345 Tsinghua University (Beijing, China). The expression plasmid for human ACE2 was  
346 obtained from GeneCopoeia (Guangzhou, China).

347

348 **Cell lines.** HEK 293T cells were purchased from the American Type Culture  
349 Collection (ATCC, Manassas, VA, USA). Cells were maintained in Dulbecco's  
350 modified Eagle medium (DMEM; Hyclone, Waltham, MA, USA) supplemented with



351 10% fetal bovine serum (FBS; Gibco, Rockville, MD, USA), 100 mg/mL of  
352 streptomycin, and 100 units/mL of penicillin at 37 °C in 5% CO<sub>2</sub>. HEK 293T cells  
353 transfected with human ACE2 (293T-ACE2) were cultured under the same  
354 conditions with the addition of G418 (0.5 mg/mL) to the medium. Elastase (from  
355 porcine pancreas) was obtained from MACKLIN Biochemical Co. (Shanghai,  
356 China).

357

358 **Antibodies and inhibitors.** The anti-RBD monoclonal antibody against the SARS-  
359 CoV-2 S protein was kindly provided by Prof. Aishun Jin from Chongqing Medical  
360 University. Recombinant human ACE2 linked to the Fc domain of human IgG1  
361 (ACE2-Ig) was purchased from Sino Biological Inc. Sivelestat sodium  
362 (MedChemExpress, Monmouth Junction, NJ, USA) Camostat mesylate (Tokyo  
363 Chemical Industry, Tokyo, Japan), and aloxistatin (E-64d; MedChemExpress) were  
364 dissolved in dimethyl sulfoxide (DMSO) at a stock concentration of 50 mM.

365

366 **Sera samples.** A total of 70 convalescent sera samples from patients with COVID-  
367 19 (at 2–4 weeks after symptom onset) were collected from three designated  
368 hospitals in Chongqing from February 1 to February 10, 2020 (Supplementary  
369 information, Table S1). All sera were tested positive using magnetic  
370 chemiluminescence enzyme immunoassay (MCLIA) kits supplied by BioScience  
371 Co. (Tianjin, China)<sup>29</sup>. Patient sera were incubated at 56 °C for 30 min to inactivate  
372 the complement prior to experiments.

373

#### 374 **SARS-CoV-2 genome analysis**

375 The online Nextstrain analysis tool (<https://nextstrain.org/ncov>) was used to track  
376 the D614G mutation in SARS-CoV-2 genomes. All the 2,834 genomes sampled  
377 between Dec 20, 2019 and Jun 12, 2020 were visualized using the ‘rectangular’  
378 layout. The mutations were labeled on branches.

379 All complete SARS-CoV-2 S gene sequences were downloaded from The National  
380 Center for Biotechnology Information (NCBI) website

381 (<https://www.ncbi.nlm.nih.gov/sars-cov-2/>) on Jun 1, 2020. We obtained 4,701 S  
382 coding sequences from NCBI, and after excluding partial and frameshift

383 sequences, 4,649 completed S sequences were used for further analysis. All S  
384 nucleotide sequences were translated to amino acid sequences. The nucleotide

385 and amino acid sequences of S were aligned with multiple sequence alignment  
386 software MULTiple Sequence Comparison by Log-Expectation (MUSCLE)

387 separately. The ‘Wuhan-Hu-1’ strain (NC\_045512) was used to as the reference  
388 sequence, and the mutations were extracted using private PERL scripts.

389

#### 390 **Western blot analysis of SARS-CoV-2 S protein expression.** To analyze S

391 protein expression in cells, S-D614- and S-G614-expressing plasmids were

392 transfected into HEK 293T cells. Total protein was extracted from cells using radio

393 immunoprecipitation assay Lysis Buffer (CoWin Biosciences, Beijing, China)

394 containing 1 mM phenylmethylsulfonyl fluoride (Beyotime, Shanghai, China). Equal

395 amounts of protein samples were electrophoretically separated by 10% sodium  
396 dodecyl sulfate polyacrylamide gel electrophoresis, and then transferred to  
397 polyvinylidene difluoride membrane (Millipore, Billerica, MA, USA). The  
398 immunoblots were probed with the indicated antibodies. Protein bands were  
399 visualized using SuperSignal West Pico Chemiluminescent Substrate kits (Bio-  
400 Rad, Hercules, CA, USA) and quantified by densitometry using ImageJ software  
401 (NCBI, Bethesda, MD, USA).

402

403 **Production and titration of SARS-CoV-2 S pseudoviruses.** SARS-CoV-2  
404 pseudotyped viruses were produced as previously described with some  
405 modifications<sup>30</sup>. Briefly,  $5 \times 10^6$  HEK 293T cells were co-transfected with 6  $\mu$ g each  
406 of pNL4-3.Luc.R-E- and recombinant SARS-CoV-2 S plasmids (pS-D614 or pS-  
407 G614) using Lipofectamine 3000 Transfection Reagent (Invitrogen) according to  
408 the manufacturer's instructions. The S-D614 and S-G614 protein pseudotyped  
409 viruses in supernatants were harvested 48 h after transfection, centrifuged, filtered  
410 through a 0.45  $\mu$ m filter, and stored at  $-80^\circ\text{C}$ . The pMD2.G was co-transfected  
411 with the pNL4-3.Luc.R-E- plasmid to package the VSV-G pseudovirus.  
412 The titers of the pseudoviruses were calculated by determining the number of viral  
413 RNA genomes per mL of viral stock solution using RT-qPCR with primers and a  
414 probe that target LTR<sup>31</sup>. Sense primer: 5'-TGTGTGCCCGTCTGTTGTGT-3', anti-  
415 sense primer: 5'-GAGTCCTGCGTCGAGAGAGC-3', probe: 5'-FAM-  
416 CAGTGGCGCCCGAACAGGGA-BHQ1-3'. Briefly, viral RNAs were extracted

417 using TRIzol (Invitrogen, Rockville, MD) and treated with RNase-free DNase  
418 (Promega, Madison, WI, USA) and re-purified using mini columns. Then, the RNA  
419 was amplified using the TaqMan One-Step RT-PCR Master Mix Reagents (Applied  
420 Biosystems, Thermo Fisher). A known quantity of pNL4-3.Luc.R-E- vector was  
421 used to generate standard curves. The S-D614 and S-G614 protein pseudotyped  
422 viruses were adjusted to the same titer (copies/mL) for the following experiments.

423

424 **SARS-CoV-2 S-mediated pseudoviral entry assay.** To detect S variant-mediated  
425 viral entry, 293T-ACE2 cells ( $2 \times 10^4$ ) grown on 96-well plates were infected with  
426 the same amount of S-D614 or S-G614 pseudovirus ( $3.8 \times 10^4$  copies in 50  $\mu$ L).  
427 The cells were transferred to fresh DMEM medium 8 h post-infection, and RLU  
428 was measured 24-72 h post-infection using Luciferase Assay Reagent (Promega,  
429 Madison, WI, USA) according to the manufacturer's protocol<sup>32</sup>.

430

431 **Neutralization and inhibition assays.** The 293T-ACE2 cells ( $2 \times 10^4$  cells/well)  
432 were seeded on 96-well plates. For the neutralization assay, 50  $\mu$ L pseudoviruses,  
433 equivalent to  $3.8 \times 10^4$  vector genomes, were incubated with serial dilutions of  
434 sera samples from patients and normal human serum as a negative control for 1 h  
435 at 37 °C, then added to the 293T-ACE2 cells (with three replicates for each  
436 dilution). For the inhibition assay, the cells were pretreated with elastase for 5 min  
437 and then infected with pseudotyped viruses in the presence of various  
438 concentrations of sivelestat sodium. After incubation for 12 h, the medium was

439 replaced with fresh cell culture medium. Luciferase activity was measured 72 h  
440 after infection and the percentage of neutralization was calculated using GraphPad  
441 Prism 6.0 software (GraphPad Software, San Diego, CA, USA). Percentage of  
442 RLU reduction (inhibition rate) was calculated as:  $1 - (\text{RLU of sample sera-control}$   
443  $\text{wells}) / (\text{RLU from mock control sera-control wells}) \times 100\%$ . The titers of  
444 neutralizing antibodies were calculated as 50% inhibitory dose (ID<sub>50</sub>).

445

446 **Statistical analyses.** Statistical analyses of the data were performed using  
447 GraphPad Prism version 6.0 software. Quantitative data in histograms are shown  
448 as means  $\pm$  SD. Statistical significance was determined using ANOVA for multiple  
449 comparisons. Student's *t*-tests were applied to compare the two groups.  
450 Differences with *P* values  $< 0.05$  were deemed statistically significant.

451

452 **Ethical approval.** The study was approved by the Ethics Commission of  
453 Chongqing Medical University (ref. no. 2020003). Written informed consent was  
454 waived by the Ethics Commission of the designated hospital for emerging  
455 infectious diseases.

456

## 457 **Acknowledgments**

458 We would like to thank Prof. Cheguo Cai (Wuhan University, Wuhan, China) for  
459 providing the pNL4-3.Luc.R-E- plasmid. We also grateful to Dr. Hongbing Jiang  
460 (Washington University in St. Louis, St. Louis, MO, USA) for the suggestions. We

461 gratefully acknowledge the authors, originating and submitting laboratories of the  
462 SARS-CoV-2 sequence data from GISAID. This work was supported by the  
463 Emergency Project from the Science & Technology Commission of Chongqing  
464 (cstc2020jscx-fyzx0053 to A-L.H.), the Emergency Project for Novel Coronavirus  
465 Pneumonia from the Chongqing Medical University (CQMUNCP0302 to K.W.), the  
466 Leading Talent Program of CQ CSTC (CSTCCXLJRC201719 to N.T.), and a Major  
467 National Science & Technology Program grant (2017ZX10202203 to A-L.H.) from  
468 the Science & Technology Commission of China.

469

#### 470 **Author contributions**

471 A-L.H., N.T., and K.W. conceived the project and supervised the study. J.H., C-  
472 L.H., Q-Z.G. and G-J.Z. performed most experiments. J.H. and K.W. performed  
473 serum neutralization assay. H-J.D. performed SARS-CoV-2 genome analysis. L-Y.  
474 H. performed structural analysis of S protein. Q-X.L., J.C. and X-X. C. collected the  
475 serum samples. J.H. and Q-Z.G. contributed to the statistical analysis. K.W. and  
476 N.T. wrote the manuscript. All the authors analyzed the final data, reviewed and  
477 approved the final version.

478

#### 479 **Competing interests**

480 The authors declare no competing interests.

481

482

483 **References:**

- 484 1. Zhou, P. *et al.* A pneumonia outbreak associated with a new coronavirus of probable  
485 bat origin. *Nature* **579**, 270–273 (2020).
- 486 2. Sanders, J. M., Monogue, M. L., Jodlowski, T. Z. & Cutrell, J. B. Pharmacologic Treatments  
487 for Coronavirus Disease 2019 (COVID-19): A Review. *JAMA* (2020)  
488 doi:10.1001/jama.2020.6019.
- 489 3. Becerra-Flores, M. & Cardozo, T. SARS-CoV-2 viral spike G614 mutation exhibits higher  
490 case fatality rate. *Int J Clin Pract* (2020) doi:10.1111/ijcp.13525.
- 491 4. Hoffmann, M. *et al.* SARS-CoV-2 Cell Entry Depends on ACE2 and TMPRSS2 and Is  
492 Blocked by a Clinically Proven Protease Inhibitor. *Cell* **181**, 271-280.e8 (2020).
- 493 5. Du, L. *et al.* The spike protein of SARS-CoV — a target for vaccine and therapeutic  
494 development. *Nat Rev Microbiol* **7**, 226–236 (2009).
- 495 6. Wrapp, D. *et al.* Cryo-EM structure of the 2019-nCoV spike in the prefusion  
496 conformation. *Science* **367**, 1260–1263 (2020).
- 497 7. Walls, A. C. *et al.* Structure, Function, and Antigenicity of the SARS-CoV-2 Spike  
498 Glycoprotein. *Cell* **181**, 281-292.e6 (2020).
- 499 8. Zhou, Y. *et al.* Protease inhibitors targeting coronavirus and filovirus entry. *Antiviral Res*  
500 **116**, 76–84 (2015).
- 501 9. Bhattacharyya, C. *et al.* Global Spread of SARS-CoV-2 Subtype with Spike Protein  
502 Mutation D614G is Shaped by Human Genomic Variations that Regulate Expression of  
503 TMPRSS2 and MX1 Genes. *bioRxiv* 2020.05.04.075911 (2020)  
504 doi:10.1101/2020.05.04.075911.

- 505 10. Wrobel, A. *et al.* *Evolution of SARS-CoV-2 spike glycoprotein.*  
506 <https://www.researchsquare.com/article/rs-29398/v1> (2020) doi:10.21203/rs.3.rs-  
507 29398/v1.
- 508 11. Song, J. *et al.* PROSPER: An Integrated Feature-Based Tool for Predicting Protease  
509 Substrate Cleavage Sites. *PLoS ONE* **7**, e50300 (2012).
- 510 12. Sandrin, V. *et al.* Lentiviral vectors pseudotyped with a modified RD114 envelope  
511 glycoprotein show increased stability in sera and augmented transduction of primary  
512 lymphocytes and CD34+ cells derived from human and nonhuman primates. *Blood* **100**,  
513 823–832 (2002).
- 514 13. Lei, C. *et al.* Neutralization of SARS-CoV-2 spike pseudotyped virus by recombinant  
515 ACE2-Ig. *Nat Commun* **11**, 2070 (2020).
- 516 14. Koyama, T., Weeraratne, D., Snowden, J. L. & Parida, L. Emergence of Drift Variants That  
517 May Affect COVID-19 Vaccine Development and Antibody Treatment. *Pathogens* **9**, 324  
518 (2020).
- 519 15. Shimizu, Y. K. *et al.* Neutralizing antibodies against hepatitis C virus and the emergence  
520 of neutralization escape mutant viruses. *Journal of Virology* **68**, 1494–1500 (1994).
- 521 16. Yao, H. *et al.* Patient-derived mutations impact pathogenicity of SARS-CoV-2. *medRxiv*  
522 2020.04.14.20060160 (2020) doi:10.1101/2020.04.14.20060160.
- 523 17. Matsuyama, S., Ujike, M., Morikawa, S., Tashiro, M. & Taguchi, F. Protease-mediated  
524 enhancement of severe acute respiratory syndrome coronavirus infection. *Proceedings*  
525 *of the National Academy of Sciences* **102**, 12543–12547 (2005).
- 526 18. Okayama, N. *et al.* Clinical effects of a neutrophil elastase inhibitor, sivelestat, in patients



- 527 with acute respiratory distress syndrome. *J Anesth* **20**, 6–10 (2006).
- 528 19. Barnes, B. J. *et al.* Targeting potential drivers of COVID-19: Neutrophil extracellular traps.  
529 *J Exp Med* **217**, (2020).
- 530 20. Mohamed, M. M. A. Neutrophil Elastase Inhibitors: A potential prophylactic treatment  
531 option for SARS-CoV-2-induced respiratory complications? 2 (2020).
- 532 21. Wang, Q. *et al.* Immunodominant SARS Coronavirus Epitopes in Humans Elicited both  
533 Enhancing and Neutralizing Effects on Infection in Non-human Primates. *ACS Infect Dis*  
534 **2**, 361–376 (2016).
- 535 22. Kim, S.-J., Nguyen, V.-G., Park, Y.-H., Park, B.-K. & Chung, H.-C. A Novel Synonymous  
536 Mutation of SARS-CoV-2: Is This Possible to Affect Their Antigenicity and  
537 Immunogenicity? *Vaccines* **8**, 220 (2020).
- 538 23. Zhang, L. *et al.* The D614G mutation in the SARS-CoV-2 spike protein reduces S1  
539 shedding and increases infectivity. *bioRxiv* 2020.06.12.148726 (2020)  
540 doi:10.1101/2020.06.12.148726.
- 541 24. Ozono, S. *et al.* Naturally mutated spike proteins of SARS-CoV-2 variants show  
542 differential levels of cell entry. *bioRxiv* 2020.06.15.151779 (2020)  
543 doi:10.1101/2020.06.15.151779.
- 544 25. Daniloski, Z., Guo, X. & Sanjana, N. E. The D614G mutation in SARS-CoV-2 Spike  
545 increases transduction of multiple human cell types. *bioRxiv* 2020.06.14.151357 (2020)  
546 doi:10.1101/2020.06.14.151357.
- 547 26. Korber, B. *et al.* Tracking changes in SARS-CoV-2 Spike: evidence that D614G increases  
548 infectivity of the COVID-19 virus. *Cell* (2020) doi:10.1016/j.cell.2020.06.043.

- 549 27. Traggiai, E. *et al.* An efficient method to make human monoclonal antibodies from  
550 memory B cells: potent neutralization of SARS coronavirus. *Nature Medicine* **10**, 871–  
551 875 (2004).
- 552 28. Connor, R. I., Chen, B. K., Choe, S. & Landau, N. R. Vpr Is Required for Efficient Replication  
553 of Human Immunodeficiency Virus Type-1 in Mononuclear Phagocytes. *Virology* **206**,  
554 935–944 (1995).
- 555 29. Long, Q.-X. *et al.* Antibody responses to SARS-CoV-2 in patients with COVID-19. *Nature*  
556 *Medicine* 1–4 (2020) doi:10.1038/s41591-020-0897-1.
- 557 30. Ou, X. *et al.* Characterization of spike glycoprotein of SARS-CoV-2 on virus entry and its  
558 immune cross-reactivity with SARS-CoV. *Nature Communications* **11**, 1620 (2020).
- 559 31. Geraerts, M., Willems, S., Baekelandt, V., Debyser, Z. & Gijssbers, R. Comparison of  
560 lentiviral vector titration methods. *BMC Biotechnol* **6**, 34 (2006).
- 561 32. Shang, J. *et al.* Cell entry mechanisms of SARS-CoV-2. *PNAS* (2020)  
562 doi:10.1073/pnas.2003138117.
- 563
- 564

565 **Table 1. Mutations in spike protein of SARS-CoV-2.**

| <b>Mutations in Spike Protein</b> | <b>No. of mutation</b> | <b>No. of wildtype</b> | <b>Total No. of sequences</b> | <b>Mutation (%)</b> |
|-----------------------------------|------------------------|------------------------|-------------------------------|---------------------|
| <b>D614G</b>                      | 2995                   | 1637                   | 4632                          | 64.659              |
| <b>A829T</b>                      | 37                     | 4602                   | 4639                          | 0.798               |
| <b>L5F</b>                        | 33                     | 4614                   | 4647                          | 0.710               |
| <b>H146Y</b>                      | 26                     | 4594                   | 4620                          | 0.563               |
| <b>P1263L</b>                     | 15                     | 4631                   | 4646                          | 0.323               |
| <b>V483A</b>                      | 12                     | 4387                   | 4399                          | 0.273               |
| <b>S939F</b>                      | 12                     | 4626                   | 4638                          | 0.259               |
| <b>R78M</b>                       | 10                     | 4623                   | 4633                          | 0.216               |
| <b>E583D</b>                      | 9                      | 4639                   | 4648                          | 0.194               |
| <b>A845S</b>                      | 9                      | 4632                   | 4641                          | 0.194               |

566 Top 10 abundant non-synonymous mutations observed in S protein of SARS-CoV-

567 2.

568 **Figures and Figure legends:**

**Figure 1**

**a**

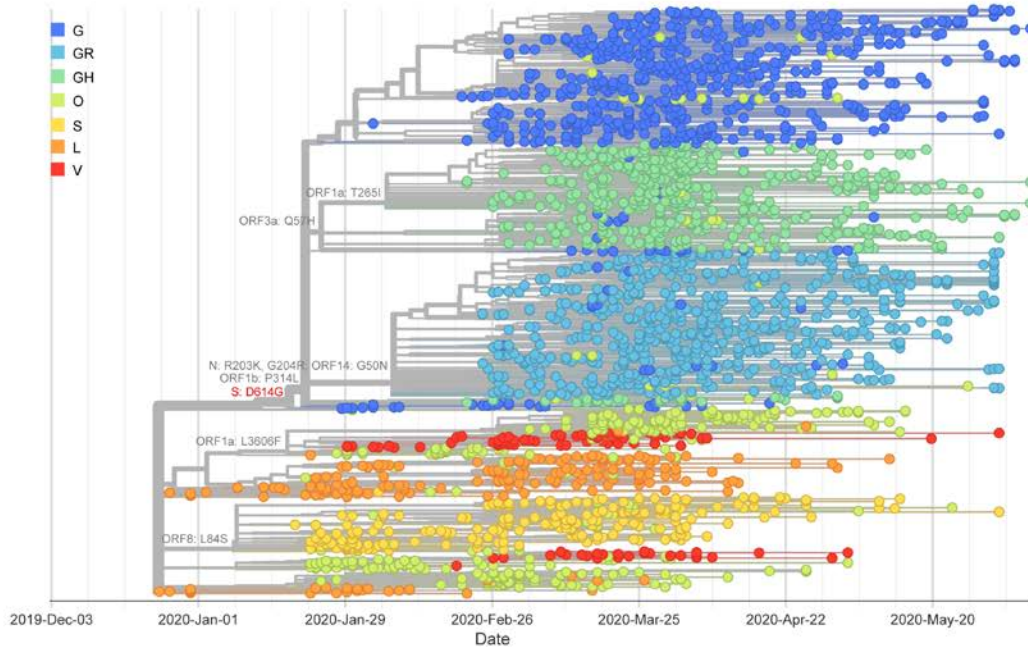

**b**

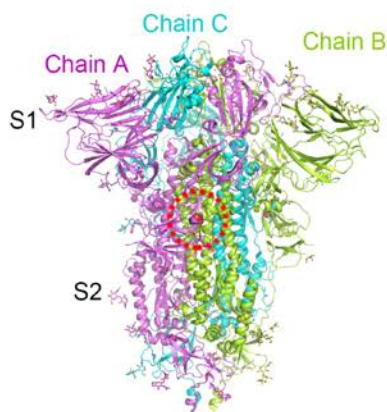

**c**

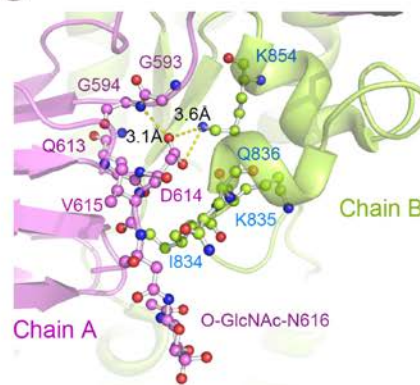

569

570 **Fig. 1. Phylogenetic timetree of SARS-CoV-2 and structural features of its**

571 **spike (S) protein. a** Phylogenetic analysis of SARS-CoV-2 sequences from

572 GISAID database. Prevalence of S-D614G genomes over time produced by the  
573 Nextstrain analysis tool using GISAID dataset ( $n = 2,834$  genomes samples from  
574 January 2020 to May 2020). **b** Cartoon representation of the trimeric SARS-CoV-2  
575 spike structure (PDB ID: 6ZGE). Three spike chains are colored in violet, lemon,  
576 and aquamarine, respectively. D614 is located at the C-terminal of the S1 subunit  
577 and is shown as violet spheres in the red dashed circle. **c** D614 involves the  
578 interactions between two S chains. Residues are highlighted by violet or lemon  
579 spheres and sticks. Yellow dashed lines indicate hydrogen bonds or salt bridges.  
580 PyMOL software (Schrödinger, LLC) was used to generate all rendered structural  
581 images.

## Figure 2

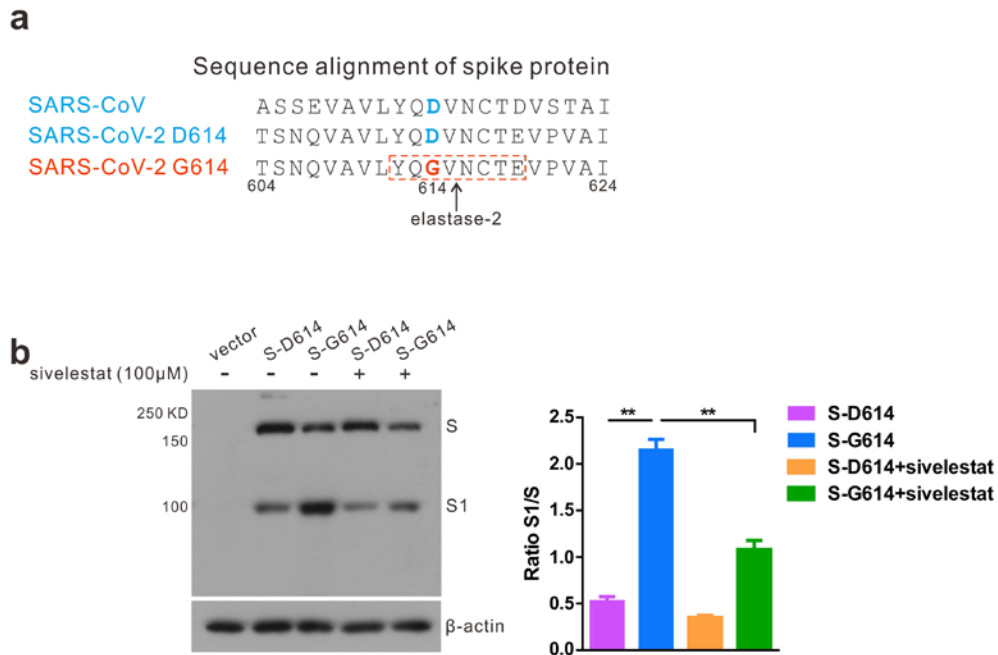

582

583 **Fig. 2 Detection of S-D614 and S-G614 protein expression and cleavage. a** An

584 additional serine protease (elastase-2) cleavage site in S1-S2 junction was

585 identified in S-614G protein of SARS-CoV-2. **b** Detection of S protein expression  
586 in HEK 293T cells by Western blot using the anti-RBD (receptor-binding domain)  
587 monoclonal antibody. Cells were transfected with pS-D614 or pS-G614 plasmids  
588 or with an empty vector and incubated with or without sivelestat sodium. To  
589 compare the S1 and S ratio, integrated density of S1/S was quantitatively  
590 analyzed using ImageJ software.  $n = 3$ ,  $\pm$ SD.  $**P < 0.01$ .

## Figure 3

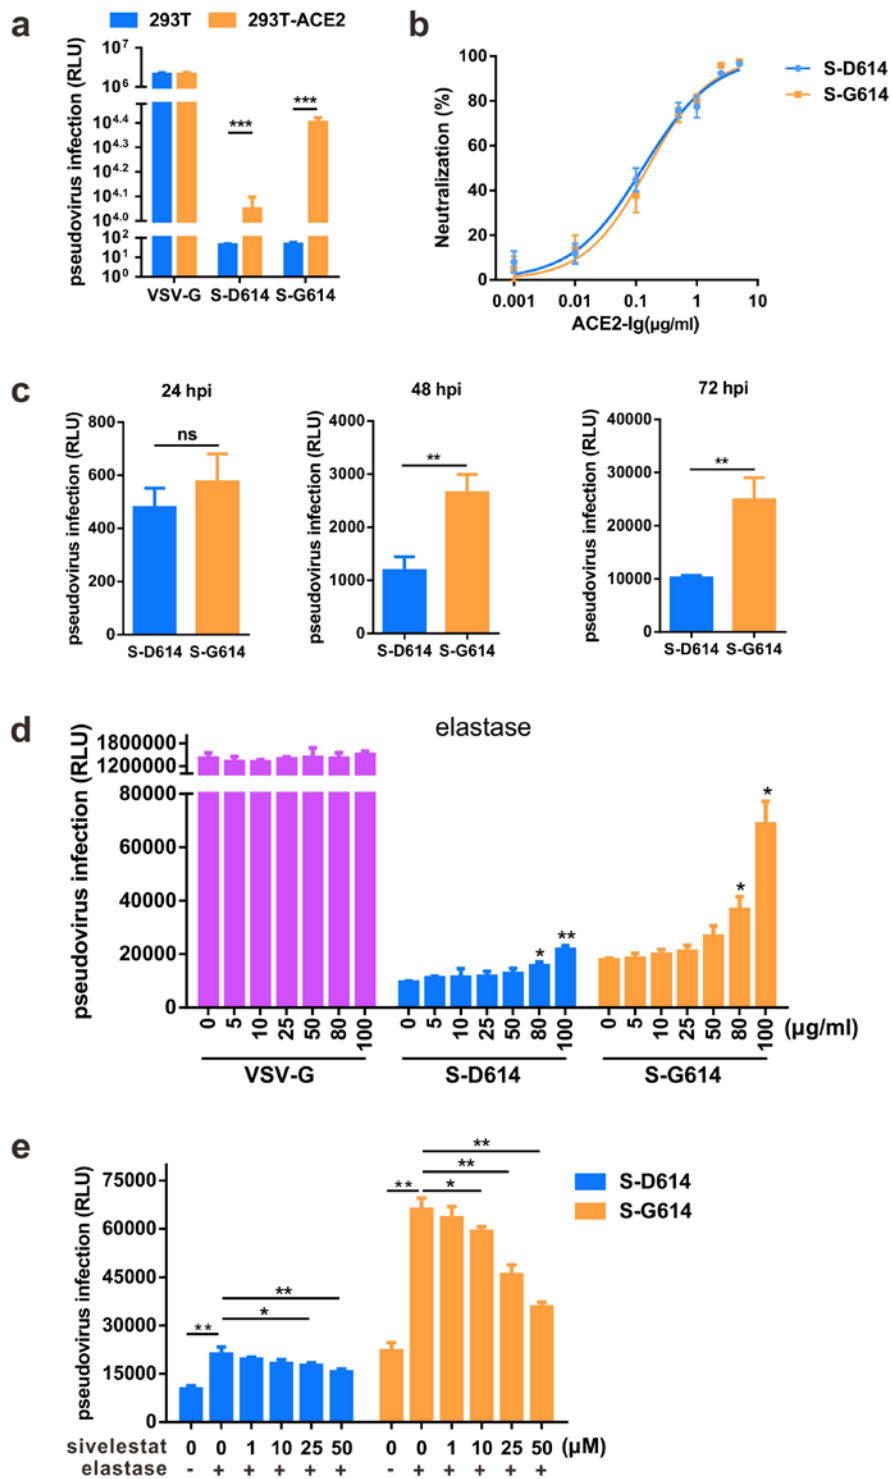

591

592 **Fig. 3 The S-G614 protein pseudotyped virus showed increased infectivity. a**

593 HEK 293T and 293T-ACE2 (human angiotensin-converting enzyme 2) cells were



594 infected with lentiviruses pseudotyped with VSV-G and SARS-CoV-2 S protein  
595 variants. Virus titers were quantified by RT-qPCR and adjusted to  $3.8 \times 10^4$  copies  
596 in 50  $\mu$ L to normalize input virus doses. The relative luminescence units (RLU)  
597 detected 72 h post-infection (hpi). **b** Inhibition of pseudoviral entry by ACE2-Ig.  
598 Pseudoviruses were pre-incubated with ACE2-Ig and added to 293T-ACE2 cells,  
599 then RLU was measured at 72 hpi. **c** Viral entry efficiency mediated by S variants.  
600 The RLU was measured at 24-72 hpi. **d-e** D614G mutation facilitates elastase-2  
601 induced pseudoviral entry. 293T-ACE2 cells were treated with elastase for 5 min  
602 and then infected with pseudotyped viruses containing the S-D614 or S-G614  
603 mutant in the presence of various concentrations of sivelestat sodium. RLU was  
604 measured at 72 hpi. n = 3,  $\pm$ SD. \* $P$  < 0.05, \*\* $P$  < 0.01. ns, not significant.

## Figure 4

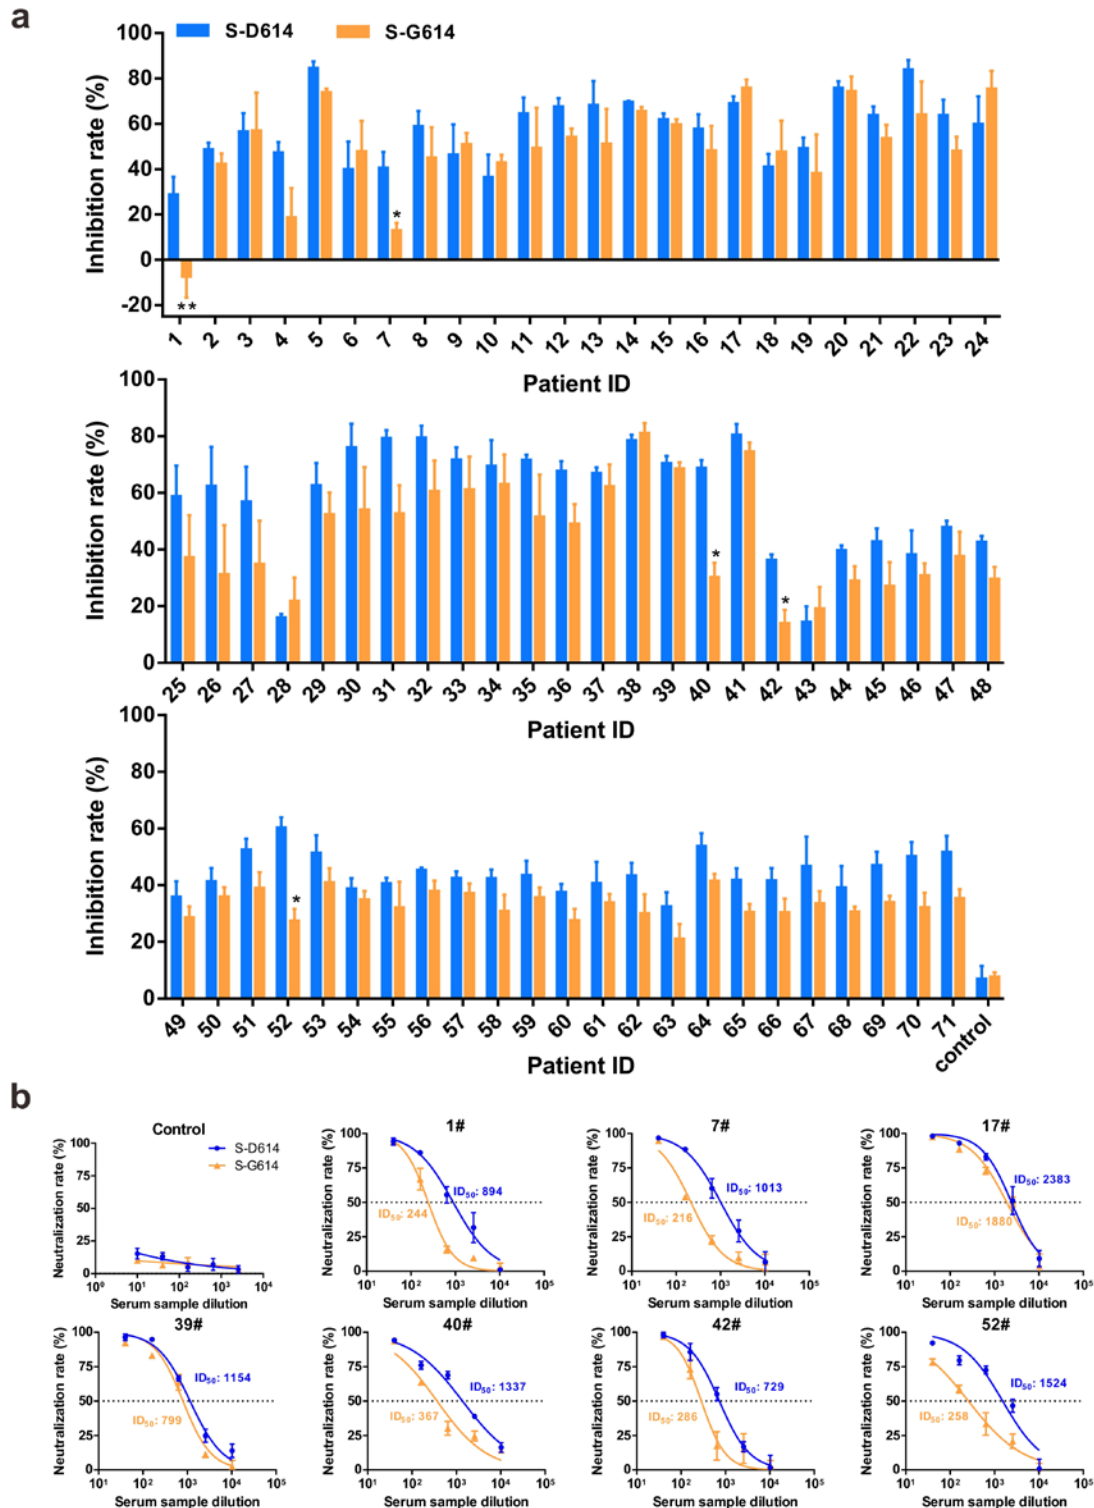

605

606 **Fig. 4 Detection of neutralizing antibodies in convalescent sera against spike**

607 **(S)-D614 and S-G614 protein pseudotyped viruses. a The inhibition rate of**

608 convalescent sera from 70 patients with COVID-19 against S-D614 and S-G614  
609 pseudoviruses. A serum sample from healthy individual was tested as a negative  
610 control. Convalescent sera were collected 2–4 weeks after symptom onset from  
611 confirmed case patients (1#–70#). Sera was analyzed at a single dilution of  
612 1:1000. RLU was measured at 72 hpi. We then compared the RLU of serum  
613 neutralized sample to the control and calculated the inhibition rate. n = 3,  $\pm$ SD. **b**  
614 The inhibition curves for serum samples from seven convalescent patients and a  
615 healthy donor. The initial dilution was 1:40, followed by 4-fold serial dilution.  
616 Neutralization titers were calculated as 50% inhibitory dose (ID<sub>50</sub>), expressed as  
617 the serum dilution at which RLUs were reduced by 50% compared with virus  
618 control wells after subtraction of background RLU in cell control wells.  
619

## Figure 5

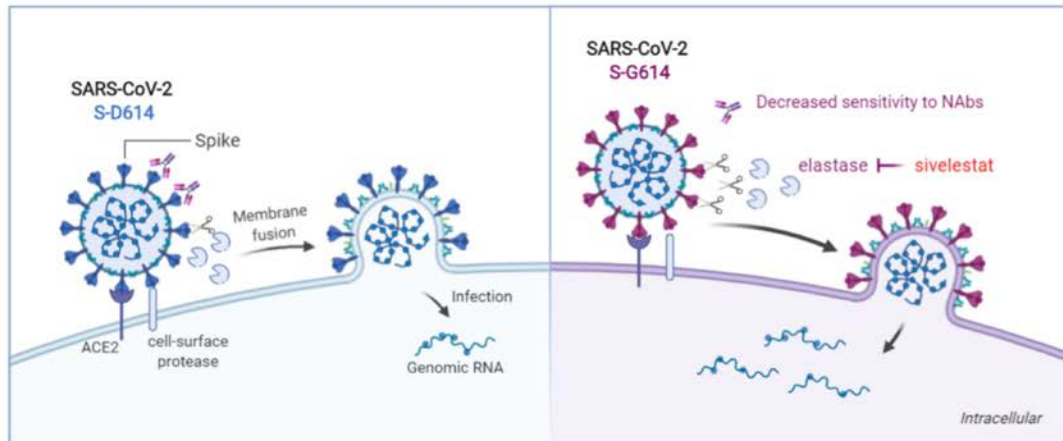

620

621 **Fig. 5 Proposed working model of this study.** Protease-mediated cell-surface

622 pathway is critical for SARS-CoV-2 entry and infection. D614G mutation introduces

623 an additional elastase-2 cut site in the spike protein of SARS-CoV-2, thereby  
624 promoting its cleavage and enhancing viral entry into host cells. The elastase-2  
625 inhibitor sivelestat partially blocks S-G614 pseudovirus infection in the presence of  
626 elastase. Both S-D614 and S-G614 variants could be similarly neutralized by most  
627 antisera, however, S-G614 mutant is more resistant to neutralizing antibodies  
628 (NAbs) from some patients infected with earlier SARS-CoV-2 variant.
